# Supplementary material for: [68Ga]Pentixafor-PET/CT for imaging of chemokine receptor 4 expression in small cell lung cancer - initial experience
Source: PubMed Central journal article supplement (PMC4891040; doi:10.18632/oncotarget.7063), 2016-01-28
Supplement: oncotarget-07-9288-s001.pdf [file oncotarget-07-9288-s001.pdf]

## **[<sup>68</sup>Ga]Pentixafor-PET/CT for imaging of chemokine receptor 4 expression in small cell lung cancer - initial experience**

### **Supplementary Material**

*Supplementary Table 1: SUV<sub>mean</sub>, SUV<sub>max</sub>, primary-to-background (P/B), hottest metastasis-to-background (M/B) ratios as well as immunoreactive scores (IRS) for [<sup>68</sup>Ga]Pentixafor-PET*

|           | Primary             |                    | Primary/Bkg         |                    | Metastasis          |                    | Metastasis/Bkg      |                    | CXCR4-IRS |
|-----------|---------------------|--------------------|---------------------|--------------------|---------------------|--------------------|---------------------|--------------------|-----------|
|           | SUV <sub>mean</sub> | SUV <sub>max</sub> | P/B <sub>mean</sub> | P/B <sub>max</sub> | SUV <sub>mean</sub> | SUV <sub>max</sub> | M/B <sub>mean</sub> | M/B <sub>max</sub> |           |
| <b>1</b>  | 7.0                 | 8.8                | 5.5                 | 3.8                | 7.4                 | 10.0               | 5.8                 | 4.4                | 8         |
| <b>2</b>  | neg                 | neg                | neg                 | neg                | neg                 | neg                | neg                 | neg                | 10        |
| <b>3</b>  | 6.9                 | 8.6                | 6.3                 | 3.7                | 14.1                | 19.4               | 12.9                | 8.3                | 4         |
| <b>4</b>  | 11.3                | 15.5               | 7.5                 | 5.1                | 11.1                | 18.1               | 7.4                 | 6.0                | 4         |
| <b>5</b>  | 6.0                 | 9.3                | 4.7                 | 3.7                | 4.2                 | 6.5                | 3.2                 | 2.6                | 0         |
| <b>6</b>  | neg                 | neg                | neg                 | neg                | neg                 | neg                | neg                 | neg                | 12        |
| <b>7</b>  | n/a                 | n/a                | n/a                 | n/a                | 3.0                 | 6.9                | 2.4                 | 2.4                | 4         |
| <b>8</b>  | 2.6                 | 4.8                | 1.3                 | 1.8                | 5.4                 | 8.6                | 2.8                 | 3.1                | 8         |
| <b>9</b>  | 5.2                 | 8.7                | 3.6                 | 2.0                | 8.9                 | 13.3               | 6.2                 | 3.1                | 3         |
| <b>10</b> | 8.0                 | 10.8               | 5.4                 | 3.6                | 7.7                 | 9.8                | 5.2                 | 3.3                | 4         |
